# Supplementary material for: Genito Pelvic Pain/Penetration Disorder (GPPPD) in Spanish Women—Clinical Approach in Primary Health Care: Review and Meta-Analysis
Source: MDPI journal article supplement (doi:10.3390/jcm11092340), 2022-04-22
Supplement: s1 [file s1]

**Supplementary Table S1.** The quality assessment of included studies. Cross-sectional studies (nine) and Case-control studies (two).

| Cross sectional studies | Items                       | 1 | 2 | 3 | 4 | 5 | 6 | 7 | 8 | TOTAL |    |       |
|-------------------------|-----------------------------|---|---|---|---|---|---|---|---|-------|----|-------|
|                         | Ávila Escribano JJ-2004     | ✓ | ✓ | X | ✓ | ✓ | X | ✓ | ✓ | 6/8   |    |       |
|                         | Ballester Arnal R-1995      | X | ✓ | X | ✓ | ✓ | X | X | ✓ | 4/8   |    |       |
|                         | García-Giralda Ruiz, L-2008 | ✓ | ✓ | ✓ | ✓ | X | X | ✓ | ? | 5/8   |    |       |
|                         | Estudio VASS.AP-2008        | ✓ | ✓ | ✓ | ✓ | X | X | ✓ | ? | 5/8   |    |       |
|                         | Hurtado Murillo F-2004      | ✓ | ✓ | ✓ | ? | X | X | ✓ | ✓ | 5/8   |    |       |
|                         | Hurtado Murillo F-2012      | ✓ | ✓ | ✓ | ✓ | ✓ | X | ✓ | ✓ | 7/8   |    |       |
|                         | Olivares Ortiz J-2012       | ✓ | ✓ | ✓ | ✓ | ✓ | X | ✓ | ✓ | 7/8   |    |       |
|                         | Tomás R-2007                | ✓ | ✓ | X | ✓ | X | X | ✓ | ✓ | 5/8   |    |       |
|                         | López-Olmos J-2010          | ✓ | ✓ | ✓ | ✓ | X | X | ✓ | ✓ | 6/8   |    |       |
| Case-Control studies    | Items                       | 1 | 2 | 3 | 4 | 5 | 6 | 7 | 8 | 9     | 10 | TOTAL |
|                         | López-Olmos J-2010          | ? | ✓ | ✓ | ✓ | ✓ | X | X | X | ✓     | ✓  | 6/10  |
|                         | MarquesMatéu MJ-1999        | ✓ | ✓ | ✓ | ✓ | ✓ | X | X | ✓ | ✓     | ✓  | 8/10  |

**Supplementary Table S2.** Studies (n = 11) meeting inclusion criteria of final analysis. For each diagnosis, its %, range, mean and the number of studies (n) are presented.

| Diagnostic [Cites]                                                                          | Range     | Mean   | Results, Raw Data, (and Number of Studies)         |
|---------------------------------------------------------------------------------------------|-----------|--------|----------------------------------------------------|
| Vaginismus [37–40]                                                                          | 0–10%     | 5%     | (%) 0; 5; 5; 10 (n = 4)                            |
| Dyspareunia [37–40,44,46,47]                                                                | 5–29%     | 16.45% | (%) 5; 5,13; 5,3; 19,5; 24,28 *; 26,92; 29 (n = 7) |
| Penetration Pain [41–45]                                                                    | 2.6–12.8% | 8.33%  | (%) 2.6; 6.93; 11; 12.8 (n = 4)                    |
| * Premenopausal subgroup, 15,72% (n = 229); Postmenopausal subgroup, 33,03% (n = 224) [47]. |           |        |                                                    |

**Supplementary Table S3.** Dyspareunia and vaginismus selected items in the classifications DSM-IV-TR, DSM-5, ICD-10 and ICD-11.

| DSM (APA)/ICD (WHO)                                                                                                                                |                                                                                                                                             |                                                                                                                                                                                                                                                                 |
|----------------------------------------------------------------------------------------------------------------------------------------------------|---------------------------------------------------------------------------------------------------------------------------------------------|-----------------------------------------------------------------------------------------------------------------------------------------------------------------------------------------------------------------------------------------------------------------|
| Classifications: DSM Includes only Mental Disorders; ICD Covers All Health Conditions                                                              | Dyspareunia (D)                                                                                                                             | Vaginismus (V)                                                                                                                                                                                                                                                  |
| DSM-IV-TR [11], D,V, as separate entities                                                                                                          | “Recurrent or persistent genital pain associated with sexual intercourse in either male or female” (Criterion A)                            | “Recurrent or persistent involuntary spasm of the musculature of the outer third of the vagina that interferes with sexual intercourse” (Criterion A)                                                                                                           |
| DSM-5 [10] merged both D,V in a single diagnostic, Genito-pelvic pain/penetration disorder (GPPPD)                                                 | Genito-pelvic pain/penetration disorder (GPPPD)                                                                                             | Genito-pelvic pain/penetration disorder (GPPPD)                                                                                                                                                                                                                 |
| ICD-10 [14] mental and behavioral disorders chapter F52. Sexual dysfunctions, not caused by organic disorder or disease. D,V, as separate entities | In mental and behavioral disorders. (F52-6) Nonorganic dyapareunia. Pain during sexual intercourse. Excludes: dyspareunia (organic) (N94.1) | In mental and behavioral disorders. (F52-5) Nonorganic vaginismus. “Spasm of the pelvic floor muscles that surround the vagina, causing occlusion of the vaginal opening. Penile entry is either impossible or painful”. Excludes: vaginismus (organic) (N94.2) |

|                                                                                             |                                                                                                                                                                                                    |                                                                                                                                |
|---------------------------------------------------------------------------------------------|----------------------------------------------------------------------------------------------------------------------------------------------------------------------------------------------------|--------------------------------------------------------------------------------------------------------------------------------|
| ICD-11 [15] D,V, as separate entities.<br>Not classified in mental and behavioral disorders | Classified in the Diseases of the<br>genitourinary system chapter. Sexual<br>pain disorders grouping, inclusions:<br>Psychogenic dyspareunia; a<br>“Condition related to sexual health”<br>(CRSH). | Sexual pain-penetration disorder<br>within grouping Sexual pain disorders.<br>A “Condition related to sexual health”<br>(CRSH) |
|---------------------------------------------------------------------------------------------|----------------------------------------------------------------------------------------------------------------------------------------------------------------------------------------------------|--------------------------------------------------------------------------------------------------------------------------------|
